# Supplementary material for: Methods for Collection of Extracellular Vesicles and Their Content RNA as Liquid Biopsy for Lung Cancer Detection: Application of Differential Centrifugation and Annexin A5 Coated Beads
Source: MDPI journal article supplement (doi:10.3390/cimb44050162), 2022-05-23
Supplement: s1 [file s1]

## *Supplementary Materials*

# **Methods for Collection of Extracellular Vesicles and Their Content RNA as Liquid Biopsy for Lung Cancer Detection: Application of Differential Centrifugation and Annexin A5 Coated Beads**

**Mei-Chia Wang** <sup>1,2,3</sup>, **Guan-Yu Gong** <sup>2</sup>, **Chih-Liang Wang** <sup>4</sup>, **How-Wen Ko** <sup>4</sup>, **Rong-Xuan Weng** <sup>5</sup>, **Pi-Yueh Chang** <sup>1,2</sup> and **Chiuan-Chian Chiou** <sup>2,3,4,5,\*</sup>

<sup>1</sup> Department of Laboratory Medicine, Chang Gung Memorial Hospital at Linkou, Taoyuan 333, Taiwan; ottermika@cgmh.org.tw (M.-C.W.); changpy@cgmh.org.tw (P.-Y.C.)

<sup>2</sup> Department of Medical Biotechnology and Laboratory Science, College of Medicine, Chang Gung University, Taoyuan 333, Taiwan; e75967259@livemail.tw

<sup>3</sup> Graduate Institute of Biomedical Sciences, College of Medicine, Chang Gung University, Taoyuan 333, Taiwan

<sup>4</sup> Department of Thoracic Medicine, Chang-Gung Memorial Hospital at Linkou, Taoyuan 333, Taiwan; wang@cgmh.org.tw (C.-L.W.); howwenko@gmail.com (H.-W.K.)

<sup>5</sup> Master and PhD Program in Biotechnolgy Industry, College of Medicine, Chang Gung University, Taoyuan 333, Taiwan; ken010194@gmail.com

\* Correspondence: ccchiou@mail.cgu.edu.tw; Tel.: +886-3211-8800 (ext. 5204)

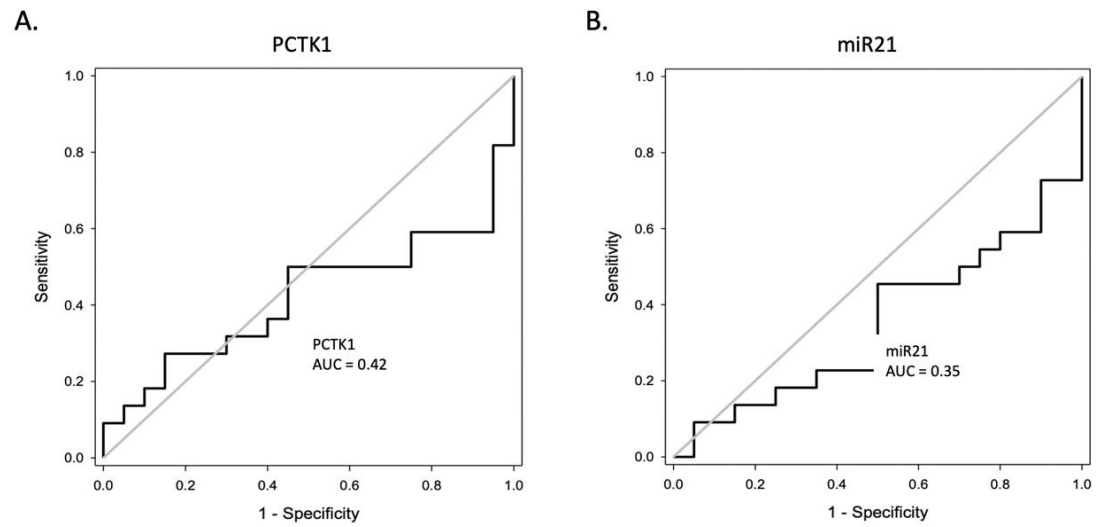

**Figure S1.** When using ANX beads for RNA purification from plasma samples, the ROC curves of PCTK1 mRNA (**A**) and miR21 microRNA (**B**) showed no promising diagnostic value in 22 NSCLC patients and 20 healthy controls.

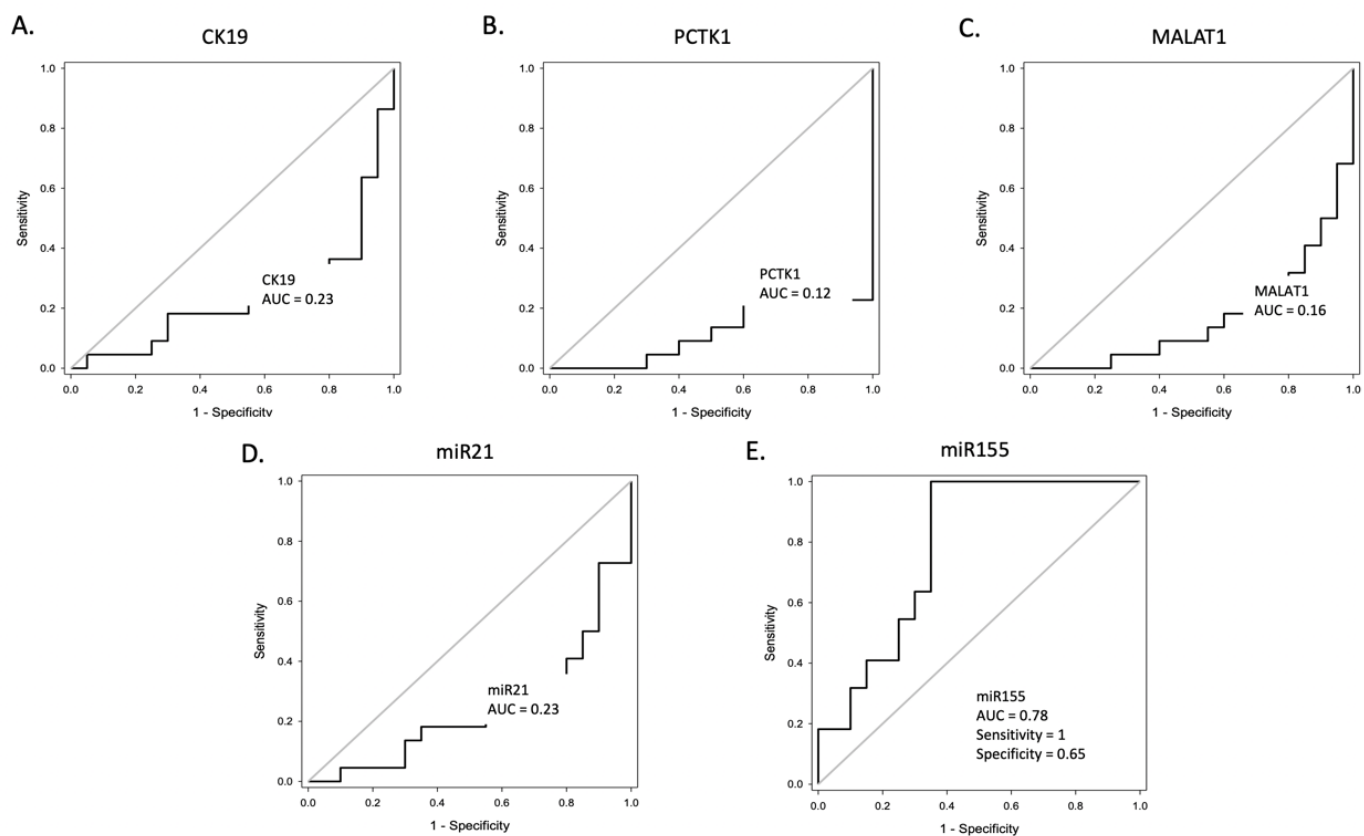

**Figure S2.** When using RNA directly purified from plasma samples, the ROC curves of all five RNA markers showed no promising diagnostic value in 22 NSCLC patients and 20 healthy controls.
